# Supplementary material for: Endurance Training in Humans Modulates the Bacterial DNA Signature of Skeletal Muscle
Source: MDPI journal article supplement (doi:10.3390/biomedicines10010064), 2021-12-29
Supplement: s1 [file s1]

## SUPPLEMENTAL MATERIAL

### Supplementary Tables

**Table S1:** 16S copy numbers per ng of extracted DNA across samples. We present the data  $\pm$ SD.

|                        | 16S copy numbers per ng<br>DNA |
|------------------------|--------------------------------|
| Muscle Untrained (N=8) | 1258 $\pm$ 179                 |
| Muscle Trained (N=8)   | 1257 $\pm$ 89                  |
| Blood Untrained (N=6)  | 852 $\pm$ 123                  |
| Blood Trained (N=6)    | 983 $\pm$ 164                  |
| Muscle-EXT-NC (N=2)    | 97 $\pm$ 8                     |
| Blood-EXT-NC (N=4)     | 75 $\pm$ 25                    |
| qPCR-NC (N=1)          | 35                             |

**Table S2:** According to the gain in  $\text{VO}_2\text{max}$  after training, the training efficiency of participants was classified as *High* ( $\Delta\text{VO}_2\text{max} > 12$ ), *Medium* ( $6 < \Delta\text{VO}_2\text{max} < 12$ ) or *Low* ( $\Delta\text{VO}_2\text{max} < 6$ ).

| Participant ID | $\Delta\text{VO}_2\text{max}$ (pre-post training) | Training Efficiency |
|----------------|---------------------------------------------------|---------------------|
| 11             | 9,94                                              | Medium              |
| 15             | 12,84                                             | High                |
| 16             | 15,85                                             | High                |
| 17             | 10,65                                             | Medium              |
| 18             | 12,93                                             | High                |
| 20             | 1,95                                              | Low                 |
| 24             | 8,25                                              | Medium              |
| 25             | 5,29                                              | Low                 |

Supplementary Figures and Figure Legends

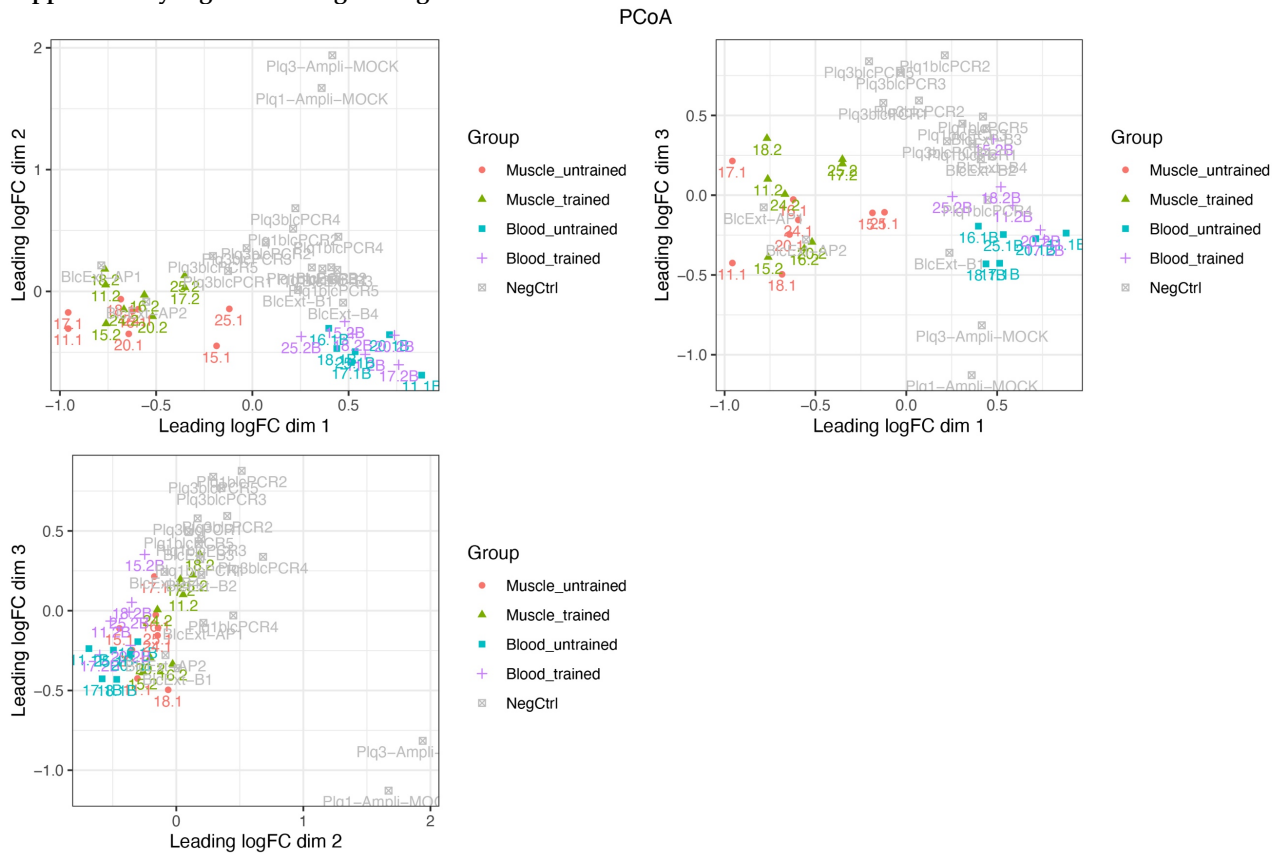

Figure S1: Multidimensional Analysis plot of samples and negative controls.

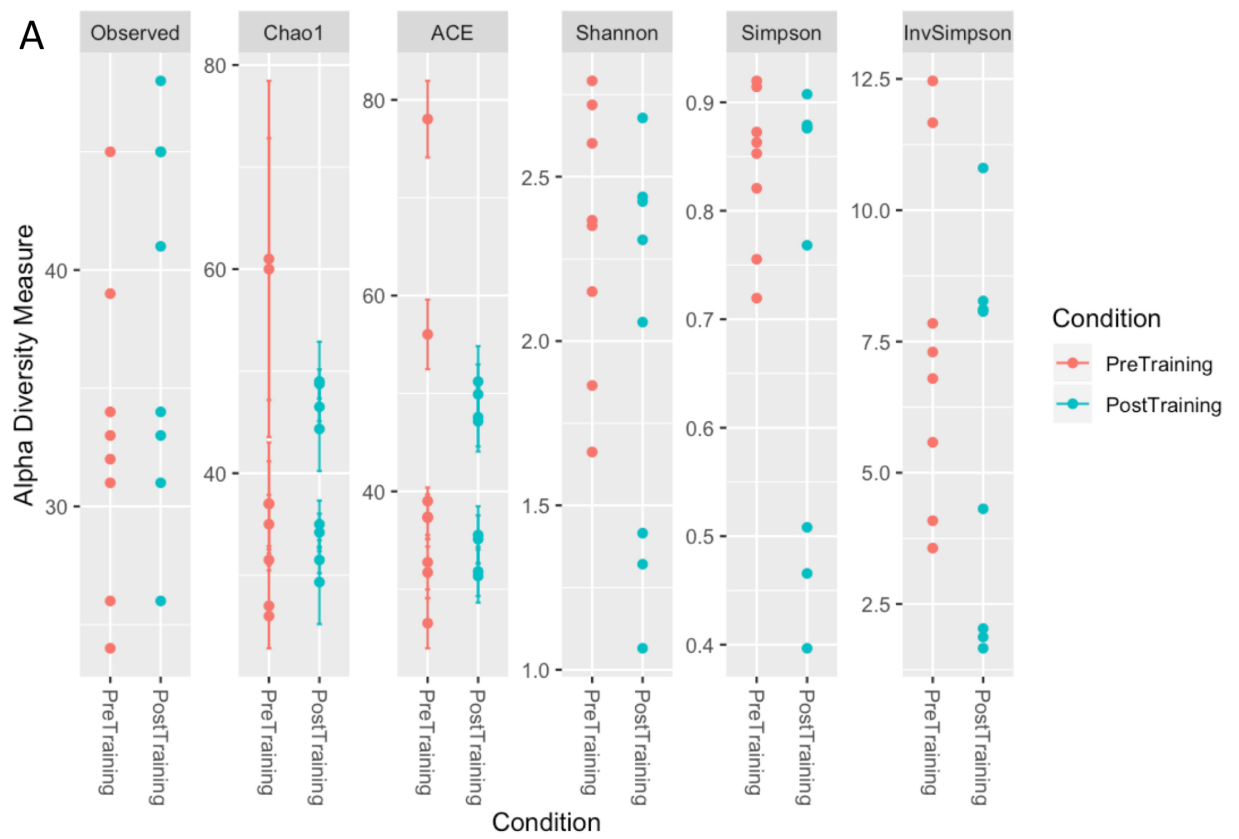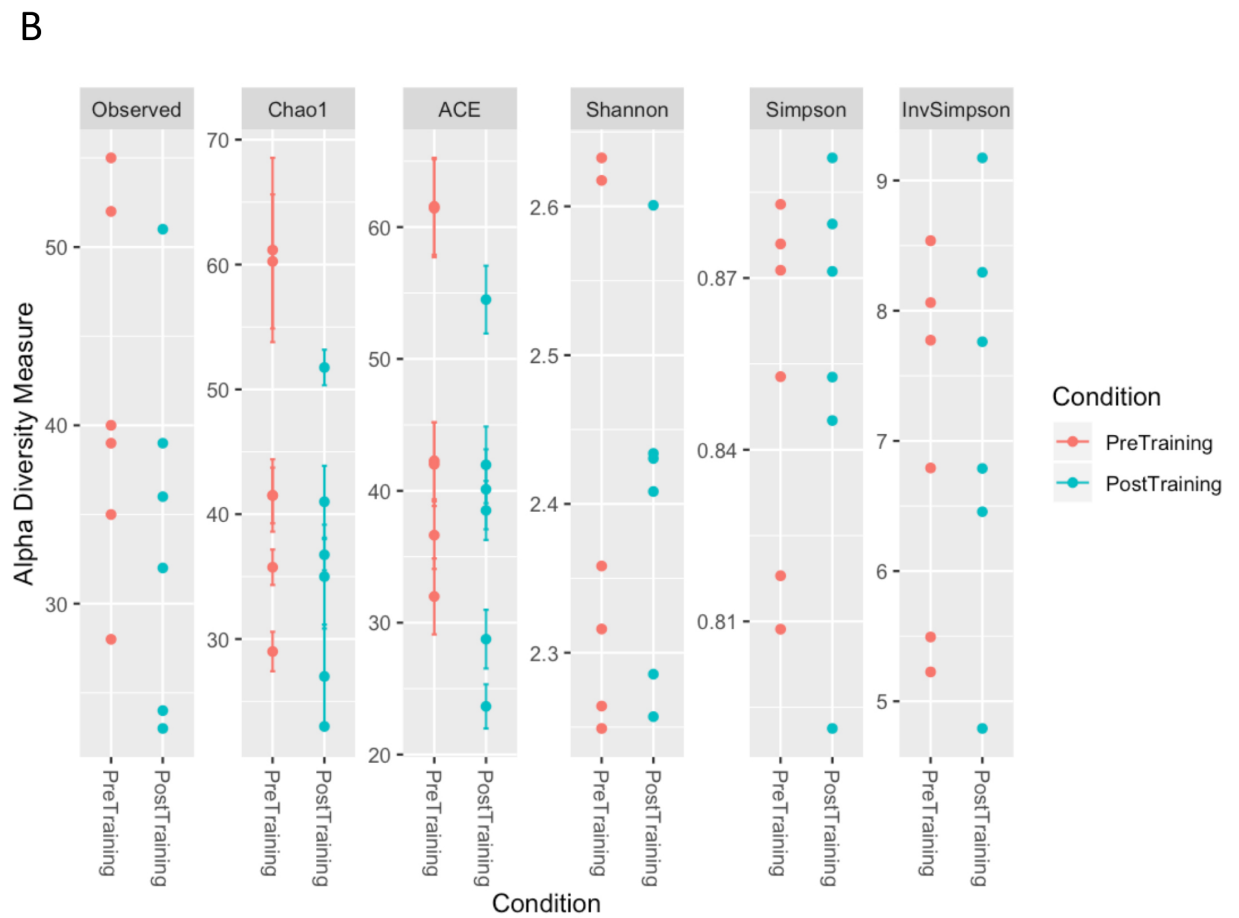

**Figure S2:** Alpha diversities in muscle (A) and blood (B).

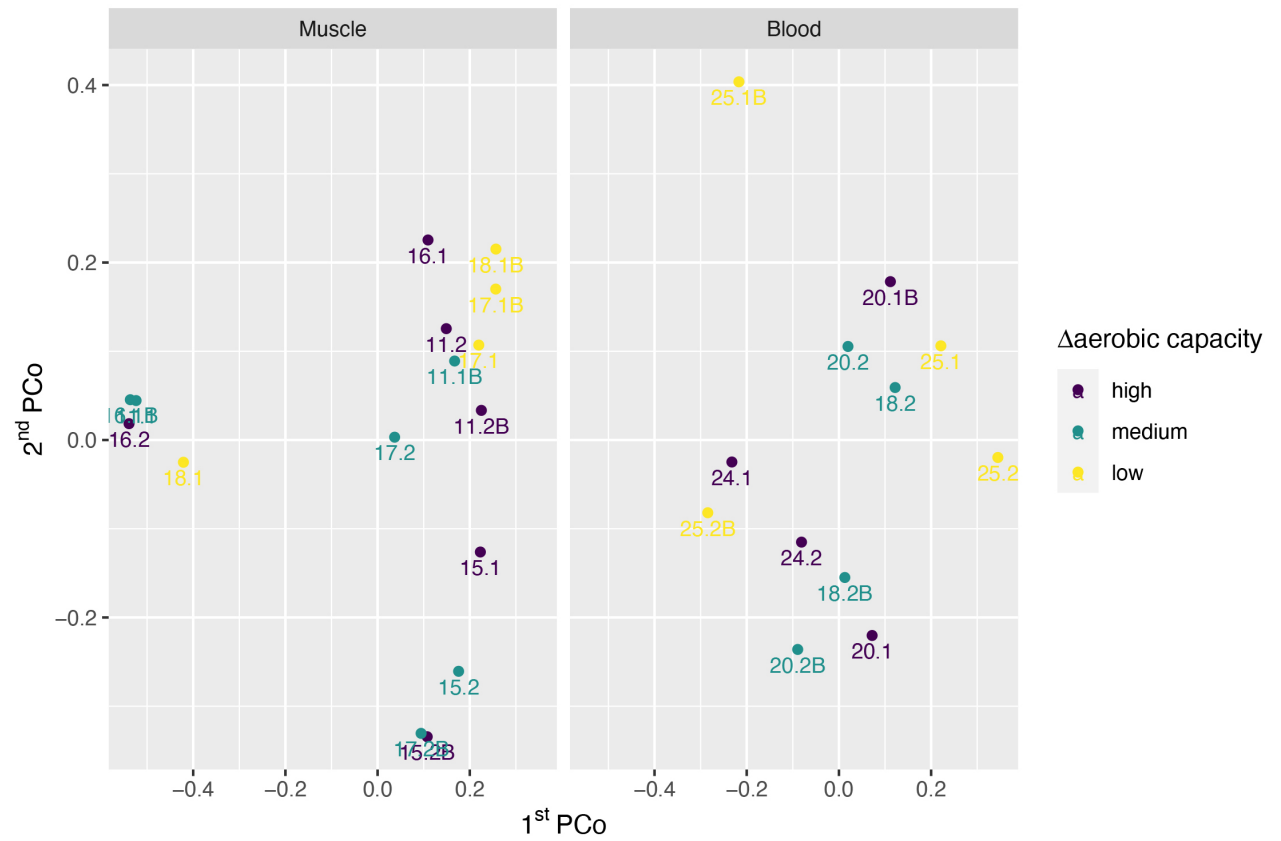

**Figure S3:** Multidimensional Analysis plot of samples coloured according to the aerobic capacity differences between untrained and trained conditions.
